# Supplementary material
Source: MDPI journal article supplement (https://www.mdpi.com/1424-8247/15/9/1050)
Supplement: s1 [file s1]

## Supplementary Material

### 2D-NMR representative spectrum of compound **4a**

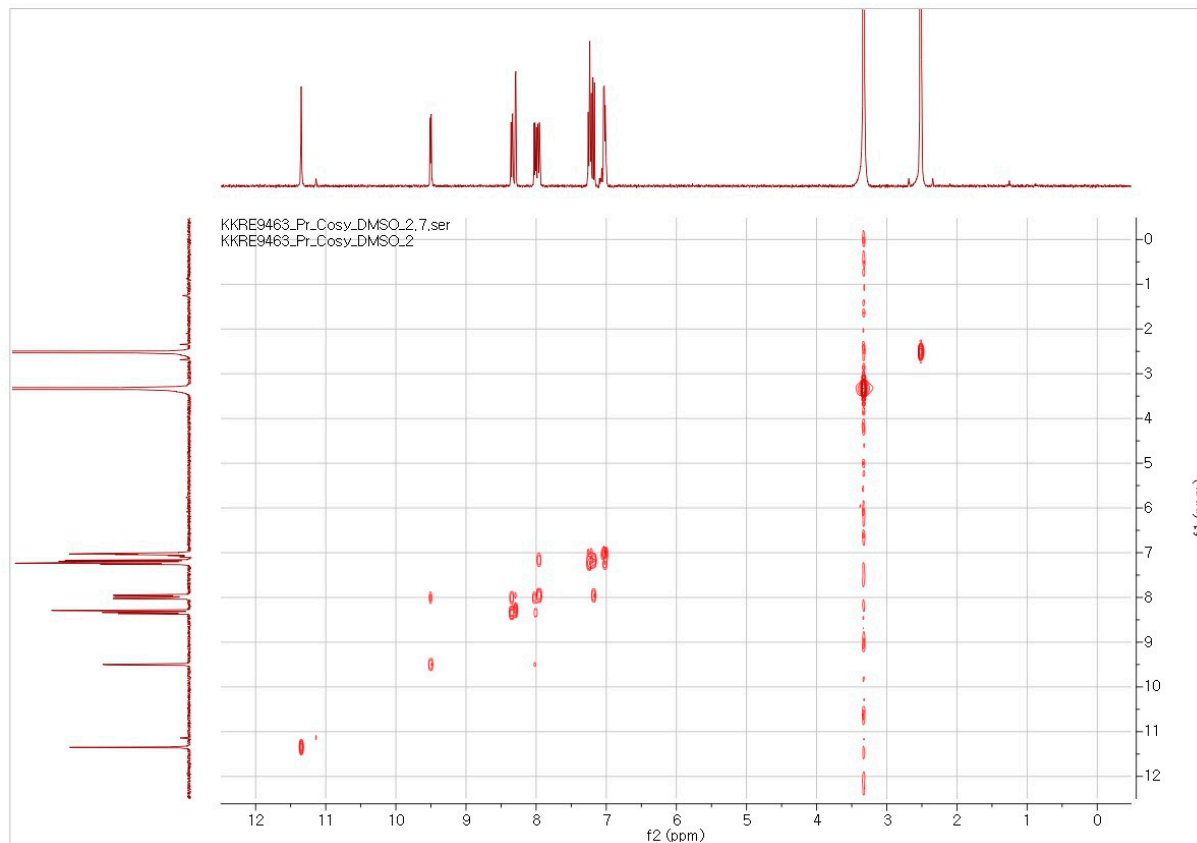

## HRMS chat of compound **4a**

### Acquisition Parameter

|             |         |                      |          |                  |           |
|-------------|---------|----------------------|----------|------------------|-----------|
| Source Type | ESI     | Ion Polarity         | Positive | Set Nebulizer    | 0.3 Bar   |
| Focus       | Active  | Set Capillary        | 4500 V   | Set Dry Heater   | 200 °C    |
| Scan Begin  | 50 m/z  | Set End Plate Offset | -500 V   | Set Dry Gas      | 4.0 l/min |
| Scan End    | 600 m/z | Set Charging Voltage | 2000 V   | Set Divert Valve | Source    |
|             |         | Set Corona           | 0 nA     | Set APCI Heater  | 0 °C      |

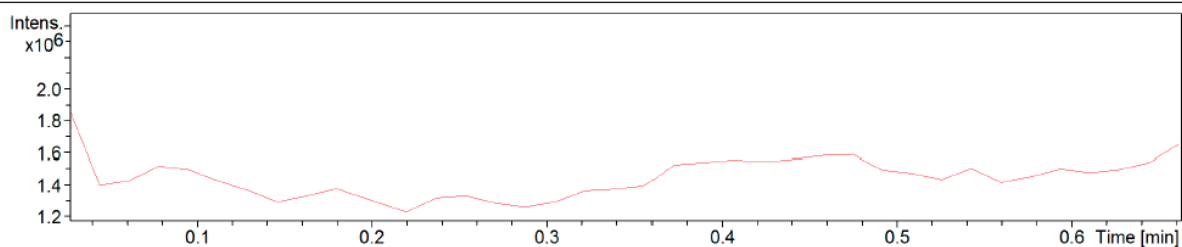

| #    | RT [min] | Area | Int. Type        | I    | S/N  | Chromatogram | Max. m/z | FWHM [min] |
|------|----------|------|------------------|------|------|--------------|----------|------------|
| n.a. | 0.4      | n.a. | Average spectrum | n.a. | n.a. | n.a.         | 366.0408 | n.a.       |

### +MS, 0.2-0.6min #10-36

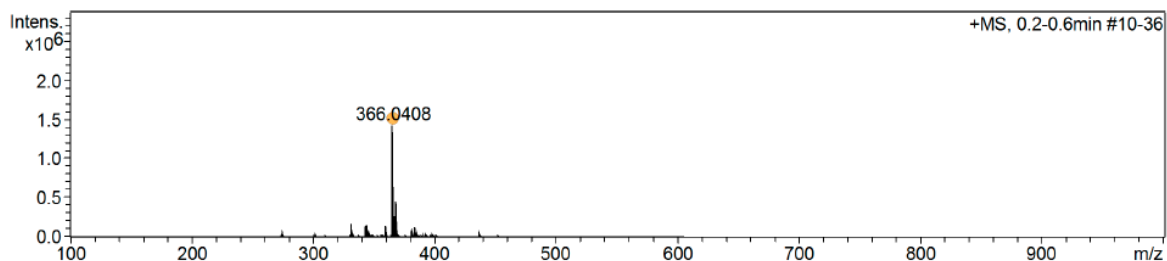

| Meas. m/z | # | Ion Formula     | m/z      | err [ppm] | mSigma | # Sigma | Score  | rdb  | e <sup>-</sup> Conf | N-Rule |
|-----------|---|-----------------|----------|-----------|--------|---------|--------|------|---------------------|--------|
| 366.0408  | 1 | C17H11ClFN3NaO2 | 366.0416 | -2.1      | 8.4    | 1       | 100.00 | 12.5 | even                | ok     |
|           | 2 | C15H10ClF4N3Na  | 366.0392 | 4.6       | 9.2    | 2       | 57.18  | 9.5  | even                | ok     |

## HRMS chat of compound **4b**

### Acquisition Parameter

|             |         |                      |          |                  |           |
|-------------|---------|----------------------|----------|------------------|-----------|
| Source Type | ESI     | Ion Polarity         | Positive | Set Nebulizer    | 0.3 Bar   |
| Focus       | Active  | Set Capillary        | 4500 V   | Set Dry Heater   | 200 °C    |
| Scan Begin  | 50 m/z  | Set End Plate Offset | -500 V   | Set Dry Gas      | 4.0 l/min |
| Scan End    | 425 m/z | Set Charging Voltage | 2000 V   | Set Divert Valve | Source    |
|             |         | Set Corona           | 0 nA     | Set APCI Heater  | 0 °C      |

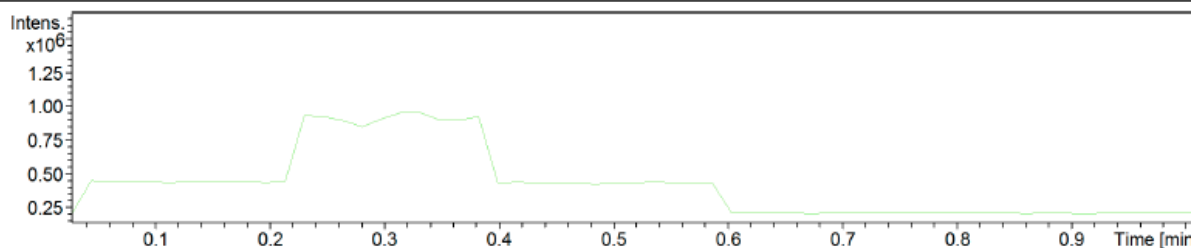

| #    | RT [min] | Area | Int. Type        | I    | S/N  | Chromatogram | Max. m/z | FWHM [min] |
|------|----------|------|------------------|------|------|--------------|----------|------------|
| n.a. | 0.7      | n.a. | Average spectrum | n.a. | n.a. | n.a.         | 366.0420 | n.a.       |

### +MS, 0.6-0.8min #34-47

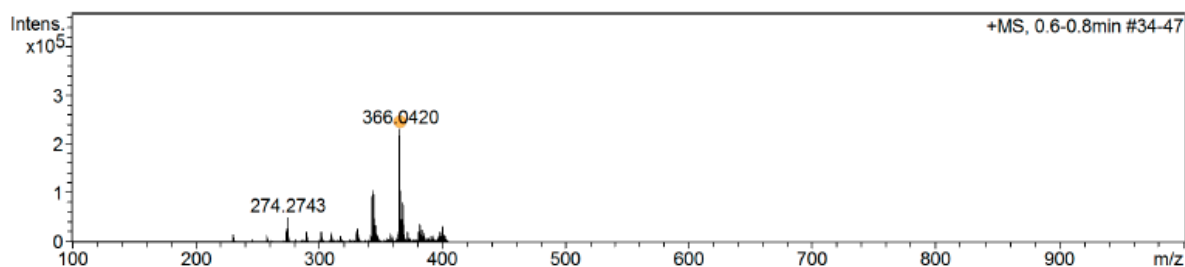

| Meas. m/z | #  | Ion Formula    | m/z      | err [ppm] | mSigma | # Sigma | Score  | rdB  | e <sup>-</sup> Conf | N-Rule |
|-----------|----|----------------|----------|-----------|--------|---------|--------|------|---------------------|--------|
| 366.0420  | 1  | C15H6ClF9      | 366.0413 | -1.7      | 5.6    | 1       | 89.02  | 16.5 | even                | ok     |
|           | 2  | C17H9ClF4N3    | 366.0416 | 1.1       | 5.6    | 2       | 100.00 | 12.5 | even                | ok     |
|           | 3  | C19H10ClF3N3O2 | 366.0440 | -5.6      | 7.5    | 3       | 34.87  | 15.5 | even                | ok     |
|           | 4  | C16H11ClF2N3O3 | 366.0452 | 8.7       | 8.0    | 4       | 12.48  | 11.5 | even                | ok     |
|           | 5  | C14H10ClF5N3O4 | 366.0400 | -5.4      | 14.5   | 5       | 32.58  | 11.5 | even                | ok     |
|           | 6  | C14H10ClF5N3O  | 366.0427 | 2.1       | 19.3   | 6       | 64.23  | 8.5  | even                | ok     |
|           | 7  | C12H7ClF2N9O   | 366.0425 | -1.4      | 19.3   | 7       | 72.51  | 12.5 | even                | ok     |
|           | 8  | C13H14ClFNO8   | 366.0386 | -9.0      | 25.2   | 8       | 7.84   | 6.5  | even                | ok     |
|           | 9  | C13H15Cl2F5NO  | 366.0445 | 7.1       | 133.7  | 9       | 0.19   | 3.5  | even                | ok     |
|           | 10 | C14H13Cl2F3N3O | 366.0382 | 10.2      | 134.4  | 10      | 0.06   | 7.5  | even                | ok     |
|           | 11 | C16H14Cl2F4N   | 366.0434 | 3.9       | 134.5  | 11      | 0.44   | 7.5  | even                | ok     |
|           | 12 | C14H11Cl2FN7   | 366.0432 | -3.3      | 134.5  | 12      | 0.51   | 11.5 | even                | ok     |
|           | 13 | C13H15Cl2FN3O4 | 366.0418 | 0.4       | 136.9  | 13      | 0.76   | 6.5  | even                | ok     |
|           | 14 | C18H15Cl2FNO2  | 366.0458 | 10.6      | 139.1  | 14      | 0.04   | 10.5 | even                | ok     |
|           | 15 | C13H18Cl3F3NO  | 366.0401 | -5.2      | 249.4  | 15      | 0.00   | 2.5  | even                | ok     |
|           | 16 | C13H16Cl3FN5   | 366.0450 | -8.3      | 249.8  | 16      | 0.00   | 6.5  | even                | ok     |
|           | 17 | C12H20Cl3FNO4  | 366.0436 | -4.6      | 251.7  | 17      | 0.00   | 1.5  | even                | ok     |
|           | 18 | C16H17Cl3F2N   | 366.0389 | 8.3       | 251.8  | 18      | 0.00   | 6.5  | even                | ok     |
|           | 1  | C17H11ClF3NaO2 | 366.0416 | -1.0      | 3.7    | 1       | 100.00 | 12.5 | even                | ok     |

# HRMS chat of compound 4c

## Analysis Info

Analysis Name D:\Data\Data\2022\KIST\NEJ\KSJ07\KSJ006.d  
 Method Tune\_pos\_Standard\_50\_600\_20210713.d.m  
 Sample Name 6KKRE9468  
 Comment

Acquisition Date 7/12/2022 5:19:41 PM

Operator lee  
 Instrument compact 8255754.10024

## Acquisition Parameter

|             |         |                      |          |                  |           |
|-------------|---------|----------------------|----------|------------------|-----------|
| Source Type | ESI     | Ion Polarity         | Positive | Set Nebulizer    | 0.3 Bar   |
| Focus       | Active  | Set Capillary        | 4500 V   | Set Dry Heater   | 200 °C    |
| Scan Begin  | 50 m/z  | Set End Plate Offset | -500 V   | Set Dry Gas      | 4.0 l/min |
| Scan End    | 400 m/z | Set Charging Voltage | 2000 V   | Set Divert Valve | Source    |
|             |         | Set Corona           | 0 nA     | Set APCI Heater  | 0 °C      |

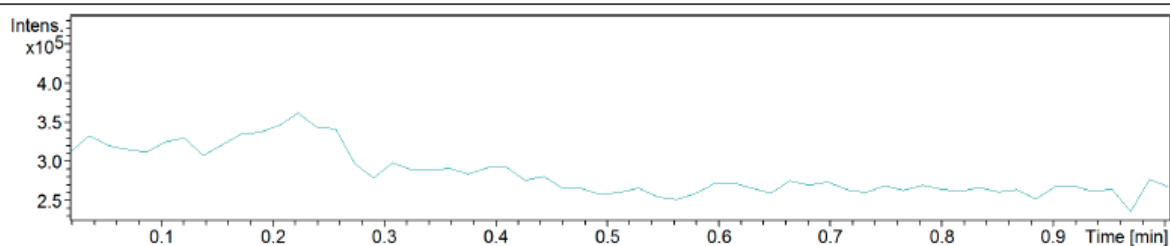

| #    | RT [min] | Area | Int. Type        | I    | S/N  | Chromatogram | Max. m/z | FWHM [min] |
|------|----------|------|------------------|------|------|--------------|----------|------------|
| n.a. | 0.4      | n.a. | Average spectrum | n.a. | n.a. | n.a.         | 343.0638 | n.a.       |

## +MS, 0.0-0.7min #2-43

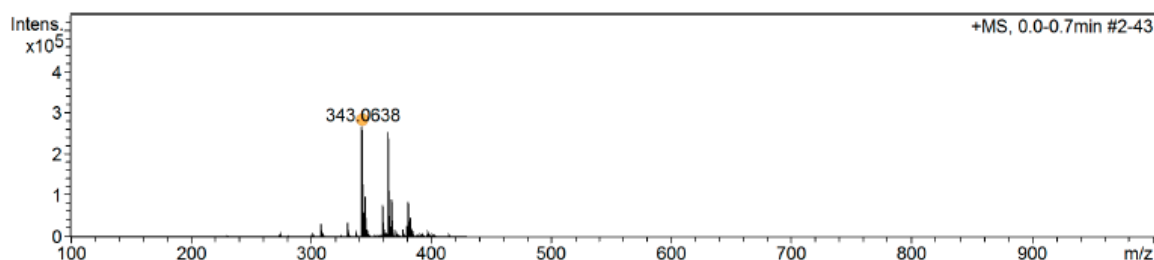

| Meas. m/z | # | Ion Formula     | m/z      | err [ppm] | mSigma | # Sigma | Score  | rdb  | e <sup>-</sup> Conf | N-Rule |
|-----------|---|-----------------|----------|-----------|--------|---------|--------|------|---------------------|--------|
| 343.0638  | 1 | C18H13ClFN2O2   | 343.0644 | -1.7      | 26.5   | 1       | 100.00 | 12.5 | even                | ok     |
|           | 2 | C14H9ClFN8      | 343.0617 | 6.1       | 33.6   | 2       | 32.41  | 13.5 | even                | ok     |
|           | 3 | C16H12ClF4N2    | 343.0620 | -5.4      | 33.6   | 3       | 38.88  | 9.5  | even                | ok     |
|           | 4 | C15H14ClF2N2O3  | 343.0656 | -5.1      | 34.9   | 4       | 40.82  | 8.5  | even                | ok     |
|           | 5 | C15H17Cl2F4     | 343.0638 | -0.1      | 121.2  | 5       | 4.00   | 4.5  | even                | ok     |
|           | 6 | C14H19Cl2F2O3   | 343.0674 | 10.4      | 123.8  | 6       | 0.26   | 3.5  | even                | ok     |
|           | 7 | C17H18Cl2FO2    | 343.0662 | 7.1       | 124.2  | 7       | 0.77   | 7.5  | even                | ok     |
|           | 1 | C21H14ClFNa     | 343.0660 | -6.4      | 25.3   | 1       | 86.56  | 13.5 | even                | ok     |
|           | 2 | C18H15ClF2NaO   | 343.0672 | 9.8       | 28.8   | 2       | 27.76  | 9.5  | even                | ok     |
|           | 3 | C16H14ClFN2NaO2 | 343.0620 | -5.3      | 32.1   | 3       | 100.00 | 9.5  | even                | ok     |
|           | 4 | C15H19Cl2FNaO2  | 343.0638 | -0.1      | 123.0  | 4       | 8.68   | 4.5  | even                | ok     |

## HRMS chat of compound **4d**

### Acquisition Parameter

|             |         |                      |          |                  |           |
|-------------|---------|----------------------|----------|------------------|-----------|
| Source Type | ESI     | Ion Polarity         | Positive | Set Nebulizer    | 0.3 Bar   |
| Focus       | Active  | Set Capillary        | 4500 V   | Set Dry Heater   | 200 °C    |
| Scan Begin  | 50 m/z  | Set End Plate Offset | -500 V   | Set Dry Gas      | 4.0 l/min |
| Scan End    | 400 m/z | Set Charging Voltage | 2000 V   | Set Divert Valve | Source    |
|             |         | Set Corona           | 0 nA     | Set APCI Heater  | 0 °C      |

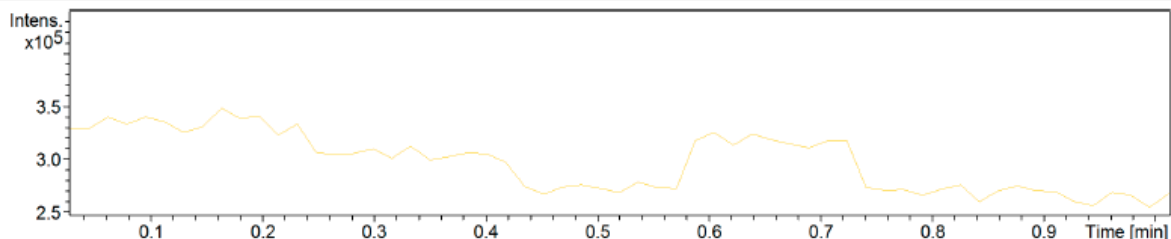

| #    | RT [min] | Area | Int. Type        | I    | S/N  | Chromatogram | Max. m/z | FWHM [min] |
|------|----------|------|------------------|------|------|--------------|----------|------------|
| n.a. | 0.7      | n.a. | Average spectrum | n.a. | n.a. | n.a.         | 344.0600 | n.a.       |

### +MS, 0.5-0.9min #26-53

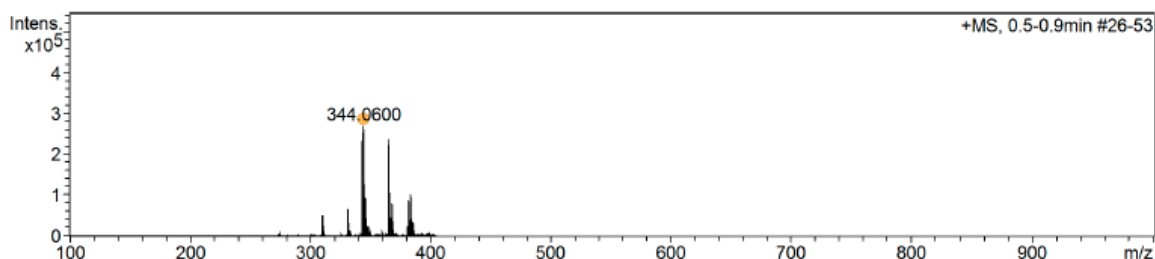

| Meas. m/z | # | Ion Formula     | m/z      | err [ppm] | mSigma | # Sigma | Score  | rdb  | e <sup>-</sup> | Conf | N-Rule |
|-----------|---|-----------------|----------|-----------|--------|---------|--------|------|----------------|------|--------|
| 344.0600  | 1 | C17H12ClFN3O2   | 344.0597 | -1.0      | 37.1   | 1       | 100.00 | 12.5 | even           |      | ok     |
|           | 2 | C22H12ClFN      | 344.0637 | 10.7      | 38.6   | 2       | 7.46   | 16.5 | even           |      | ok     |
|           | 3 | C13H8ClFN9      | 344.0570 | 8.8       | 42.0   | 3       | 13.06  | 13.5 | even           |      | ok     |
|           | 4 | C15H11ClF4N3    | 344.0572 | -8.1      | 42.0   | 4       | 16.43  | 9.5  | even           |      | ok     |
|           | 5 | C14H13ClF2N3O3  | 344.0608 | 2.3       | 43.0   | 5       | 68.66  | 8.5  | even           |      | ok     |
|           | 6 | C14H13ClF6N     | 344.0635 | -10.2     | 46.7   | 6       | 7.06   | 5.5  | even           |      | ok     |
|           | 7 | C14H16Cl2F4N    | 344.0590 | -2.8      | 124.3  | 7       | 2.47   | 4.5  | even           |      | ok     |
|           | 8 | C13H18Cl2F2NO3  | 344.0626 | 7.6       | 126.9  | 8       | 0.65   | 3.5  | even           |      | ok     |
|           | 9 | C16H17Cl2FNO2   | 344.0615 | -4.3      | 127.1  | 9       | 1.55   | 7.5  | even           |      | ok     |
|           | 1 | C20H13ClFNNa    | 344.0613 | 3.7       | 36.7   | 1       | 100.00 | 13.5 | even           |      | ok     |
|           | 2 | C17H14ClF2NNaO  | 344.0624 | 7.0       | 38.6   | 2       | 41.30  | 9.5  | even           |      | ok     |
|           | 3 | C15H13ClFN3NaO2 | 344.0573 | -8.0      | 40.9   | 3       | 28.35  | 9.5  | even           |      | ok     |
|           | 4 | C14H15ClF3NNaO2 | 344.0636 | -10.3     | 45.5   | 4       | 11.29  | 5.5  | even           |      | ok     |
|           | 5 | C14H18Cl2FNNaO2 | 344.0591 | -2.7      | 126.1  | 5       | 3.68   | 4.5  | even           |      | ok     |

## HRMS chat of compound 4e

### Acquisition Parameter

|             |         |                      |          |                  |           |
|-------------|---------|----------------------|----------|------------------|-----------|
| Source Type | ESI     | Ion Polarity         | Positive | Set Nebulizer    | 0.3 Bar   |
| Focus       | Active  | Set Capillary        | 4500 V   | Set Dry Heater   | 200 °C    |
| Scan Begin  | 50 m/z  | Set End Plate Offset | -500 V   | Set Dry Gas      | 4.0 l/min |
| Scan End    | 400 m/z | Set Charging Voltage | 2000 V   | Set Divert Valve | Source    |
|             |         | Set Corona           | 0 nA     | Set APCI Heater  | 0 °C      |

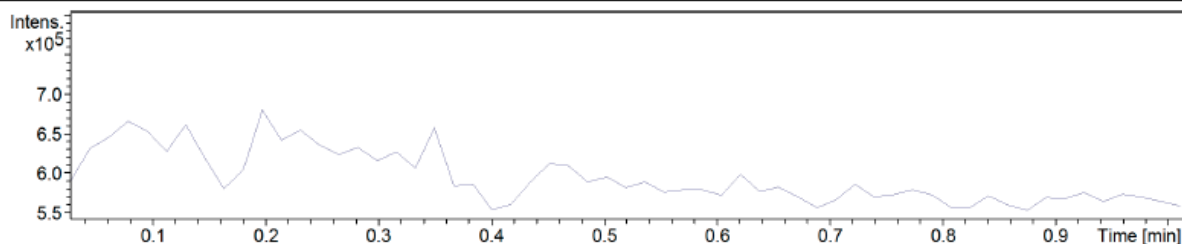

| #    | RT [min] | Area | Int. Type        | I    | S/N  | Chromatogram | Max. m/z | FWHM [min] |
|------|----------|------|------------------|------|------|--------------|----------|------------|
| n.a. | 0.4      | n.a. | Average spectrum | n.a. | n.a. | n.a.         | 343.0640 | n.a.       |

### +MS, 0.0-0.8min #2-45

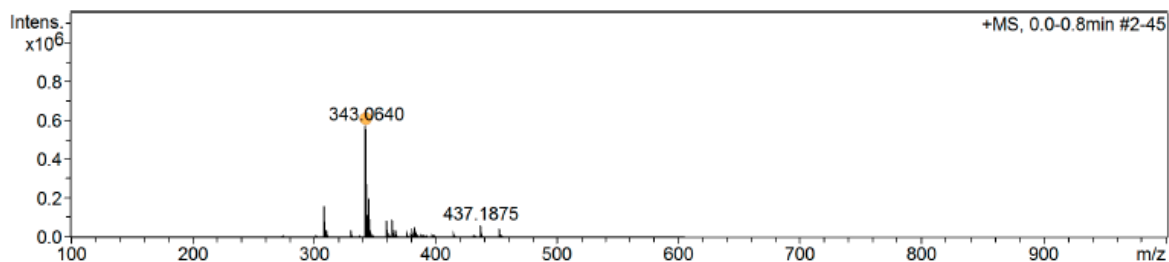

| Meas. m/z | #  | Ion Formula      | m/z      | err [ppm] | mSigma | # Sigma | Score  | rdb  | e <sup>-</sup> Conf | N-Rule |
|-----------|----|------------------|----------|-----------|--------|---------|--------|------|---------------------|--------|
| 343.0640  | 1  | C18H13ClFN2O2    | 343.0644 | -1.2      | 10.8   | 1       | 100.00 | 12.5 | even                | ok     |
|           | 2  | C14H9ClFN8       | 343.0617 | 6.7       | 17.9   | 2       | 26.02  | 13.5 | even                | ok     |
|           | 3  | C16H12ClF4N2     | 343.0620 | -6.0      | 18.0   | 3       | 31.52  | 9.5  | even                | ok     |
|           | 4  | C15H14ClF2N2O3   | 343.0656 | -4.5      | 20.0   | 4       | 43.56  | 8.5  | even                | ok     |
|           | 5  | C13H13ClFN4O4    | 343.0604 | -10.6     | 25.6   | 5       | 6.09   | 8.5  | even                | ok     |
|           | 6  | C13H13ClF5N2O    | 343.0631 | 2.6       | 30.5   | 6       | 50.48  | 5.5  | even                | ok     |
|           | 7  | C15H17Cl2F4      | 343.0638 | 0.6       | 128.9  | 7       | 1.56   | 4.5  | even                | ok     |
|           | 8  | C13H14Cl2FN6     | 343.0636 | -1.3      | 129.0  | 8       | 1.39   | 8.5  | even                | ok     |
|           | 9  | C14H19Cl2F2O3    | 343.0674 | 9.8       | 131.4  | 9       | 0.14   | 3.5  | even                | ok     |
|           | 10 | C17H18Cl2FO2     | 343.0662 | -6.5      | 132.6  | 10      | 0.37   | 7.5  | even                | ok     |
|           | 1  | C18H15ClF2NaO    | 343.0672 | 9.2       | 12.7   | 1       | 24.63  | 9.5  | even                | ok     |
|           | 2  | C21H14ClFNa      | 343.0660 | -5.9      | 14.9   | 2       | 64.80  | 13.5 | even                | ok     |
|           | 3  | C16H14ClFN2NaO2  | 343.0620 | -5.9      | 16.4   | 3       | 63.07  | 9.5  | even                | ok     |
|           | 4  | C13H15ClF2N2NaO3 | 343.0631 | 2.5       | 29.3   | 4       | 100.00 | 5.5  | even                | ok     |
|           | 5  | C13H15ClF6Na     | 343.0659 | 5.4       | 35.8   | 5       | 36.10  | 2.5  | even                | ok     |
|           | 6  | C13H18Cl2F4Na    | 343.0614 | -7.6      | 128.4  | 6       | 0.63   | 1.5  | even                | ok     |
|           | 7  | C15H19Cl2FNaO2   | 343.0638 | 0.5       | 130.9  | 7       | 2.66   | 4.5  | even                | ok     |

## HRMS chat of compound **4g**

### Acquisition Parameter

|             |         |                      |          |                  |           |
|-------------|---------|----------------------|----------|------------------|-----------|
| Source Type | ESI     | Ion Polarity         | Positive | Set Nebulizer    | 0.3 Bar   |
| Focus       | Active  | Set Capillary        | 4500 V   | Set Dry Heater   | 200 °C    |
| Scan Begin  | 50 m/z  | Set End Plate Offset | -500 V   | Set Dry Gas      | 4.0 l/min |
| Scan End    | 420 m/z | Set Charging Voltage | 2000 V   | Set Divert Valve | Source    |
|             |         | Set Corona           | 0 nA     | Set APCI Heater  | 0 °C      |

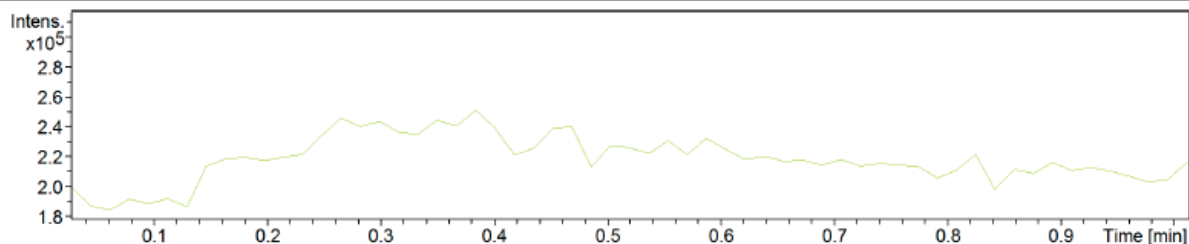

| #    | RT [min] | Area | Int. Type        | I    | S/N  | Chromatogram | Max. m/z | FWHM [min] |
|------|----------|------|------------------|------|------|--------------|----------|------------|
| n.a. | 0.5      | n.a. | Average spectrum | n.a. | n.a. | n.a.         | 344.0601 | n.a.       |

### +MS, 0.1-0.9min #6-55

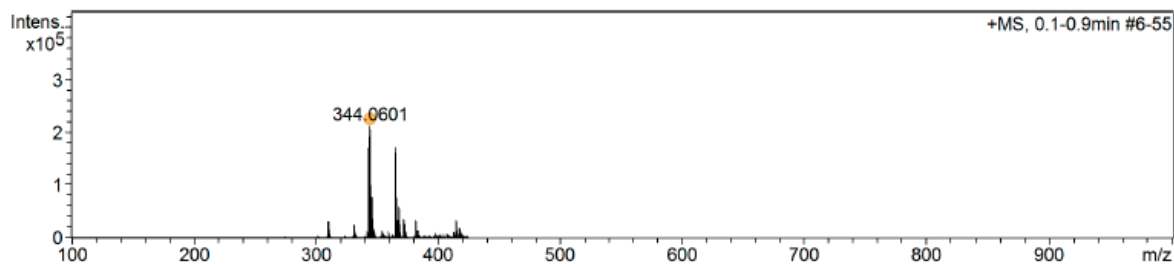

| Meas. m/z | # | Ion Formula     | m/z      | err [ppm] | mSigma | # Sigma | Score  | rdb  | e <sup>-</sup> Conf | N-Rule |
|-----------|---|-----------------|----------|-----------|--------|---------|--------|------|---------------------|--------|
| 344.0601  | 1 | C17H12ClFN3O2   | 344.0597 | -1.2      | 19.8   | 1       | 100.00 | 12.5 | even                | ok     |
|           | 2 | C22H12ClFN      | 344.0637 | 10.5      | 20.6   | 2       | 8.17   | 16.5 | even                | ok     |
|           | 3 | C13H8ClFN9      | 344.0570 | -9.0      | 28.7   | 3       | 11.97  | 13.5 | even                | ok     |
|           | 4 | C15H11ClF4N3    | 344.0572 | 8.3       | 28.7   | 4       | 15.08  | 9.5  | even                | ok     |
|           | 5 | C14H13ClF2N3O3  | 344.0608 | -2.2      | 30.4   | 5       | 66.13  | 8.5  | even                | ok     |
|           | 6 | C14H13ClF6N     | 344.0635 | -10.1     | 35.6   | 6       | 6.79   | 5.5  | even                | ok     |
|           | 7 | C14H16Cl2F4N    | 344.0590 | 2.9       | 122.0  | 7       | 1.86   | 4.5  | even                | ok     |
|           | 8 | C13H18Cl2F2NO3  | 344.0626 | -7.5      | 124.7  | 8       | 0.51   | 3.5  | even                | ok     |
|           | 9 | C16H17Cl2FNO2   | 344.0615 | -4.2      | 124.9  | 9       | 1.22   | 7.5  | even                | ok     |
|           | 1 | C20H13ClFNNa    | 344.0613 | 3.5       | 17.9   | 1       | 100.00 | 13.5 | even                | ok     |
|           | 2 | C17H14ClF2NNaO  | 344.0624 | -6.9      | 22.8   | 2       | 39.47  | 9.5  | even                | ok     |
|           | 3 | C15H13ClFN3NaO2 | 344.0573 | 8.1       | 26.9   | 3       | 24.32  | 9.5  | even                | ok     |
|           | 4 | C14H15ClF3NNaO2 | 344.0636 | -10.2     | 34.1   | 4       | 10.12  | 5.5  | even                | ok     |
|           | 5 | C14H18Cl2FNNaO2 | 344.0591 | 2.8       | 123.9  | 5       | 2.55   | 4.5  | even                | ok     |

## HRMS chat of compound **4i**

### Acquisition Parameter

|             |         |                      |          |                  |           |
|-------------|---------|----------------------|----------|------------------|-----------|
| Source Type | ESI     | Ion Polarity         | Positive | Set Nebulizer    | 0.3 Bar   |
| Focus       | Active  | Set Capillary        | 4500 V   | Set Dry Heater   | 200 °C    |
| Scan Begin  | 50 m/z  | Set End Plate Offset | -500 V   | Set Dry Gas      | 4.0 l/min |
| Scan End    | 600 m/z | Set Charging Voltage | 2000 V   | Set Divert Valve | Source    |
|             |         | Set Corona           | 0 nA     | Set APCI Heater  | 0 °C      |

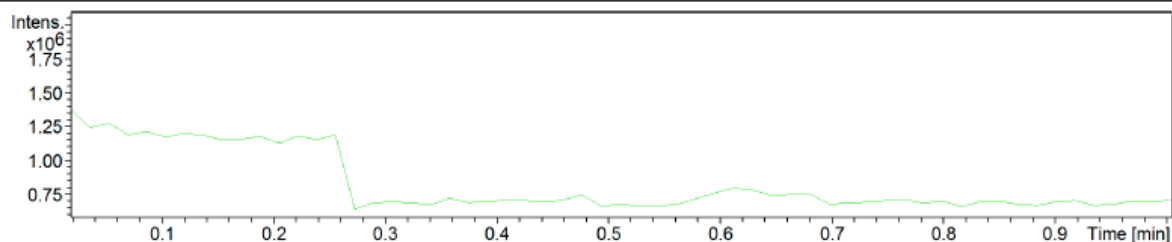

| #    | RT [min] | Area | Int. Type        | I    | S/N  | Chromatogram | Max. m/z | FWHM [min] |
|------|----------|------|------------------|------|------|--------------|----------|------------|
| n.a. | 0.6      | n.a. | Average spectrum | n.a. | n.a. | n.a.         | 366.0415 | n.a.       |

### +MS, 0.2-1.0min #9-57

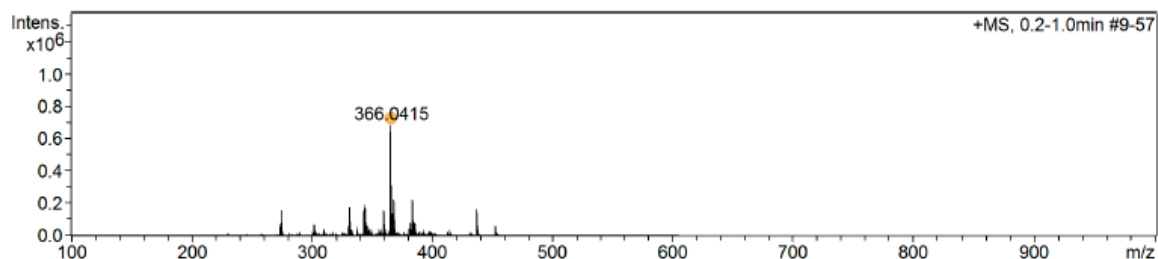

| Meas. m/z | #  | Ion Formula      | m/z      | err [ppm] | mSigma | # Sigma | Score  | rdb  | e <sup>-</sup> Conf | N-Rule |
|-----------|----|------------------|----------|-----------|--------|---------|--------|------|---------------------|--------|
| 366.0415  | 1  | C17H11ClFN3NaO2  | 366.0416 | 0.2       | 4.9    | 1       | 100.00 | 12.5 | even                | ok     |
|           | 2  | C15H10ClF4N3Na   | 366.0392 | -6.4      | 11.9   | 2       | 21.86  | 9.5  | even                | ok     |
|           | 3  | C13H7ClFN9Na     | 366.0389 | -7.1      | 11.9   | 3       | 17.77  | 13.5 | even                | ok     |
|           | 4  | C14H12ClF2N3NaO3 | 366.0427 | 3.4       | 16.3   | 4       | 45.02  | 8.5  | even                | ok     |
|           | 5  | C14H12ClF6NNa    | 366.0455 | -10.8     | 20.2   | 5       | 3.71   | 5.5  | even                | ok     |
|           | 6  | C12H9ClF3N7Na    | 366.0452 | 10.1      | 20.2   | 6       | 4.89   | 9.5  | even                | ok     |
|           | 7  | C12H11ClFN5NaO4  | 366.0376 | -10.7     | 22.8   | 7       | 3.60   | 8.5  | even                | ok     |
|           | 8  | C12H11ClF5N3NaO  | 366.0403 | -3.3      | 26.7   | 8       | 36.32  | 5.5  | even                | ok     |
|           | 9  | C14H15Cl2F4NNa   | 366.0410 | 1.4       | 138.7  | 9       | 0.49   | 4.5  | even                | ok     |
|           | 10 | C12H12Cl2FN7Na   | 366.0407 | -2.1      | 138.8  | 10      | 0.44   | 8.5  | even                | ok     |
|           | 11 | C13H17Cl2F2NNaO3 | 366.0446 | -8.4      | 141.3  | 11      | 0.07   | 3.5  | even                | ok     |
|           | 12 | C16H16Cl2FNNaO2  | 366.0434 | 5.2       | 142.4  | 12      | 0.17   | 7.5  | even                | ok     |



## HRMS chat of compound 4j

### Acquisition Parameter

|             |         |                      |          |                  |           |
|-------------|---------|----------------------|----------|------------------|-----------|
| Source Type | ESI     | Ion Polarity         | Positive | Set Nebulizer    | 0.3 Bar   |
| Focus       | Active  | Set Capillary        | 4500 V   | Set Dry Heater   | 200 °C    |
| Scan Begin  | 50 m/z  | Set End Plate Offset | -500 V   | Set Dry Gas      | 4.0 l/min |
| Scan End    | 600 m/z | Set Charging Voltage | 2000 V   | Set Divert Valve | Source    |
|             |         | Set Corona           | 0 nA     | Set APCI Heater  | 0 °C      |

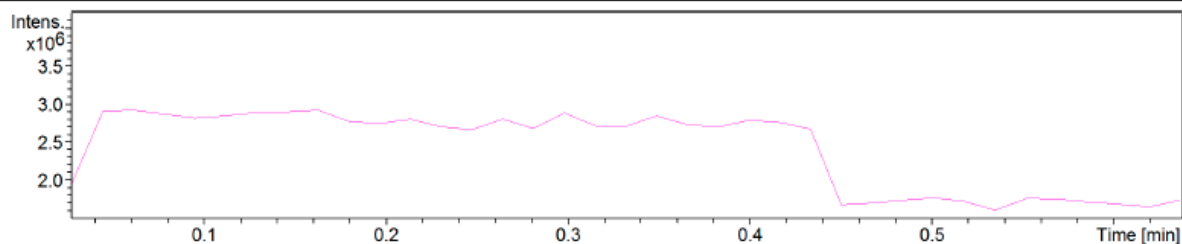

| #    | RT [min] | Area | Int. Type        | I    | S/N  | Chromatogram | Max. m/z | FWHM [min] |
|------|----------|------|------------------|------|------|--------------|----------|------------|
| n.a. | 0.1      | n.a. | Average spectrum | n.a. | n.a. | n.a.         | 343.0648 | n.a.       |

### +MS, 0.0-0.1min #2-5

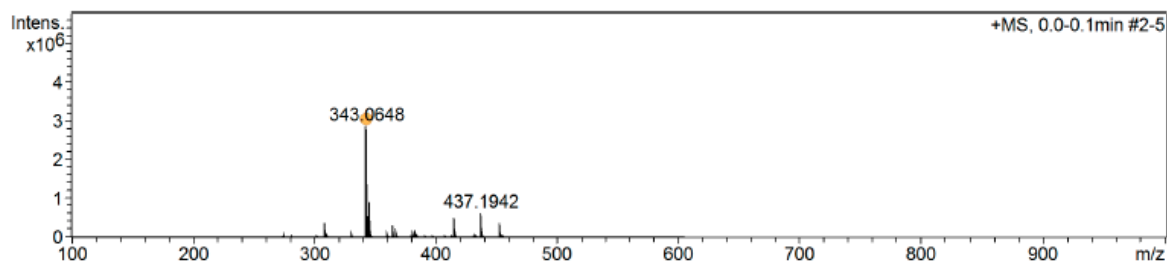

| Meas. m/z | #  | Ion Formula      | m/z      | err [ppm] | mSigma | # Sigma | Score  | rdB  | e <sup>-</sup> Conf | N-Rule |
|-----------|----|------------------|----------|-----------|--------|---------|--------|------|---------------------|--------|
| 343.0648  | 1  | C16H12ClF4N2     | 343.0620 | -8.2      | 9.7    | 1       | 20.58  | 9.5  | even                | ok     |
|           | 2  | C14H9ClF8        | 343.0617 | 8.9       | 9.7    | 2       | 16.33  | 13.5 | even                | ok     |
|           | 3  | C15H14ClF2N2O3   | 343.0656 | -2.2      | 12.8   | 3       | 86.95  | 8.5  | even                | ok     |
|           | 4  | C15H14ClF6       | 343.0683 | 10.1      | 13.6   | 4       | 9.93   | 5.5  | even                | ok     |
|           | 5  | C13H11ClF3N6     | 343.0680 | 9.4       | 13.7   | 5       | 12.77  | 9.5  | even                | ok     |
|           | 6  | C18H13ClF2N2O2   | 343.0644 | -1.1      | 15.1   | 6       | 100.00 | 12.5 | even                | ok     |
|           | 7  | C13H13ClF5N2O    | 343.0631 | 4.9       | 19.2   | 7       | 43.28  | 5.5  | even                | ok     |
|           | 8  | C11H10ClF2N8O    | 343.0629 | -5.6      | 19.2   | 8       | 36.34  | 9.5  | even                | ok     |
|           | 9  | C12H15ClF3N2O4   | 343.0667 | 5.5       | 23.7   | 9       | 33.53  | 4.5  | even                | ok     |
|           | 10 | C23H13ClF        | 343.0684 | -10.6     | 33.7   | 10      | 5.33   | 16.5 | even                | ok     |
|           | 11 | C12H18Cl2F5O     | 343.0649 | -0.4      | 143.2  | 11      | 0.73   | 0.5  | even                | ok     |
|           | 12 | C15H17Cl2F4      | 343.0638 | 2.9       | 143.8  | 12      | 0.46   | 4.5  | even                | ok     |
|           | 13 | C13H14Cl2FN6     | 343.0636 | -3.6      | 143.9  | 13      | 0.40   | 8.5  | even                | ok     |
|           | 14 | C11H20Cl2F3O4    | 343.0685 | -10.9     | 146.0  | 14      | 0.04   | -0.5 | even                | ok     |
|           | 15 | C14H19Cl2F2O3    | 343.0674 | 7.5       | 146.0  | 15      | 0.13   | 3.5  | even                | ok     |
|           | 16 | C12H18Cl2FN2O4   | 343.0622 | -7.5      | 146.3  | 16      | 0.13   | 3.5  | even                | ok     |
|           | 17 | C17H18Cl2FO2     | 343.0662 | 4.2       | 148.2  | 17      | 0.26   | 7.5  | even                | ok     |
|           | 18 | C12H19Cl3FN4     | 343.0654 | -1.7      | 256.8  | 18      | 0.00   | 3.5  | even                | ok     |
|           | 1  | C16H14ClF2N2NaO2 | 343.0620 | -8.1      | 11.0   | 1       | 39.38  | 9.5  | even                | ok     |

## HRMS chat of compound **4k**

### Acquisition Parameter

|             |         |                      |          |                  |           |
|-------------|---------|----------------------|----------|------------------|-----------|
| Source Type | ESI     | Ion Polarity         | Positive | Set Nebulizer    | 0.3 Bar   |
| Focus       | Active  | Set Capillary        | 4500 V   | Set Dry Heater   | 200 °C    |
| Scan Begin  | 50 m/z  | Set End Plate Offset | -500 V   | Set Dry Gas      | 4.0 l/min |
| Scan End    | 600 m/z | Set Charging Voltage | 2000 V   | Set Divert Valve | Source    |
|             |         | Set Corona           | 0 nA     | Set APCI Heater  | 0 °C      |

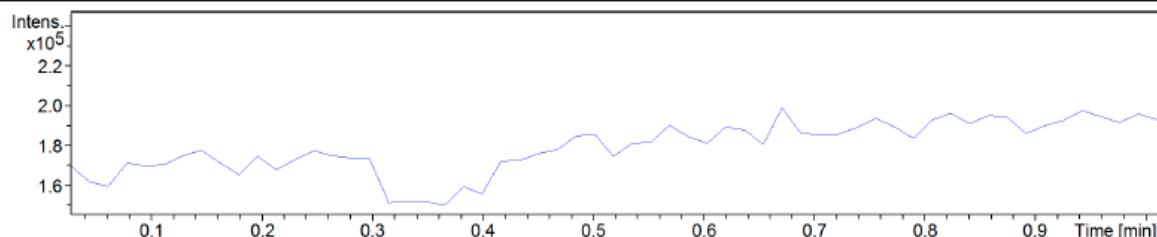

| #    | RT [min] | Area | Int. Type        | I    | S/N  | Chromatogram | Max. m/z | FWHM [min] |
|------|----------|------|------------------|------|------|--------------|----------|------------|
| n.a. | 0.6      | n.a. | Average spectrum | n.a. | n.a. | n.a.         | 343.0639 | n.a.       |

### +MS, 0.3-1.0min #16-57

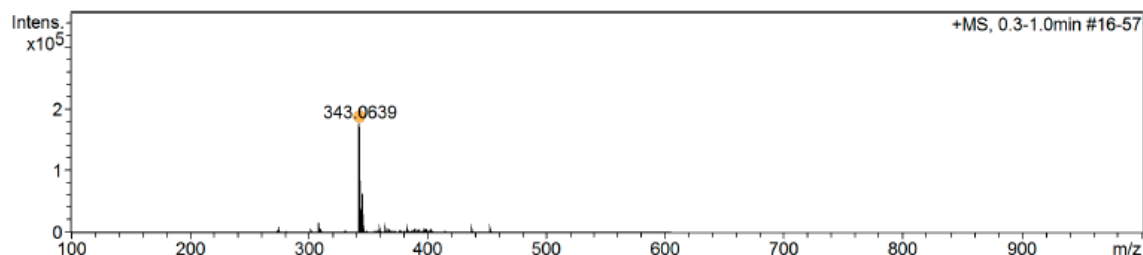

| Meas. m/z | #  | Ion Formula      | m/z      | err [ppm] | mSigma | # Sigma | Score  | rdb  | e <sup>-</sup> Conf | N-Rule |
|-----------|----|------------------|----------|-----------|--------|---------|--------|------|---------------------|--------|
| 343.0639  | 1  | C18H13ClFN2O2    | 343.0644 | 1.6       | 8.2    | 1       | 100.00 | 12.5 | even                | ok     |
|           | 2  | C16H12ClF4N2     | 343.0620 | 5.5       | 18.6   | 2       | 35.85  | 9.5  | even                | ok     |
|           | 3  | C14H9ClFN8       | 343.0617 | 6.2       | 18.6   | 3       | 29.82  | 13.5 | even                | ok     |
|           | 4  | C15H14ClF2N2O3   | 343.0656 | -4.9      | 21.2   | 4       | 39.11  | 8.5  | even                | ok     |
|           | 5  | C13H13ClFN4O4    | 343.0604 | -10.1     | 27.4   | 5       | 7.08   | 8.5  | even                | ok     |
|           | 6  | C13H13ClF5N2O    | 343.0631 | -2.2      | 32.5   | 6       | 53.58  | 5.5  | even                | ok     |
|           | 7  | C15H17Cl2F4      | 343.0638 | -0.2      | 128.9  | 7       | 1.70   | 4.5  | even                | ok     |
|           | 8  | C13H14Cl2FN6     | 343.0636 | -0.9      | 129.0  | 8       | 1.53   | 8.5  | even                | ok     |
|           | 9  | C14H19Cl2F2O3    | 343.0674 | 10.3      | 131.6  | 9       | 0.12   | 3.5  | even                | ok     |
|           | 10 | C17H18Cl2FO2     | 343.0662 | 6.9       | 132.4  | 10      | 0.33   | 7.5  | even                | ok     |
|           | 1  | C21H14ClFNa      | 343.0660 | -6.3      | 9.7    | 1       | 61.38  | 13.5 | even                | ok     |
|           | 2  | C18H15ClF2NaO    | 343.0672 | 9.7       | 11.7   | 2       | 20.75  | 9.5  | even                | ok     |
|           | 3  | C16H14ClFN2NaO2  | 343.0620 | 5.4       | 17.0   | 3       | 67.66  | 9.5  | even                | ok     |
|           | 4  | C13H15ClF2N2NaO3 | 343.0631 | -2.1      | 31.3   | 4       | 100.00 | 5.5  | even                | ok     |
|           | 5  | C13H15ClF6Na     | 343.0659 | 5.9       | 40.4   | 5       | 27.53  | 2.5  | even                | ok     |
|           | 6  | C13H18Cl2F4Na    | 343.0614 | -7.2      | 128.6  | 6       | 0.68   | 1.5  | even                | ok     |
|           | 7  | C15H19Cl2FNaO2   | 343.0638 | 0.1       | 130.9  | 7       | 2.73   | 4.5  | even                | ok     |

## HRMS chat of compound **4l**

### Acquisition Parameter

|             |         |                      |          |                  |           |
|-------------|---------|----------------------|----------|------------------|-----------|
| Source Type | ESI     | Ion Polarity         | Positive | Set Nebulizer    | 0.3 Bar   |
| Focus       | Active  | Set Capillary        | 4500 V   | Set Dry Heater   | 200 °C    |
| Scan Begin  | 50 m/z  | Set End Plate Offset | -500 V   | Set Dry Gas      | 4.0 l/min |
| Scan End    | 400 m/z | Set Charging Voltage | 2000 V   | Set Divert Valve | Source    |
|             |         | Set Corona           | 0 nA     | Set APCI Heater  | 0 °C      |

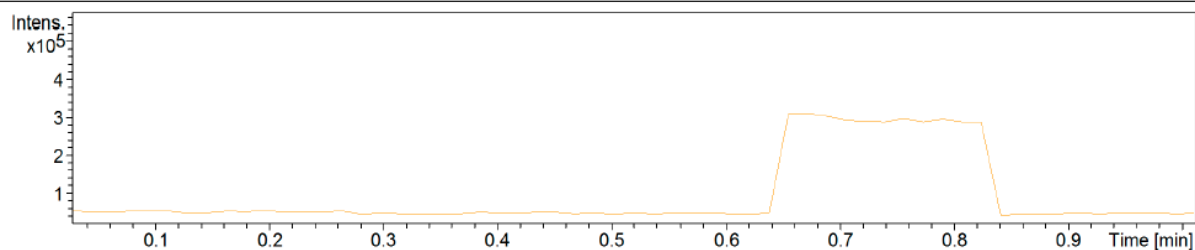

| #    | RT [min] | Area | Int. Type        | I    | S/N  | Chromatogram | Max. m/z | FWHM [min] |
|------|----------|------|------------------|------|------|--------------|----------|------------|
| n.a. | 0.5      | n.a. | Average spectrum | n.a. | n.a. | n.a.         | 344.0596 | n.a.       |

### +MS, 0.3-0.7min #17-38

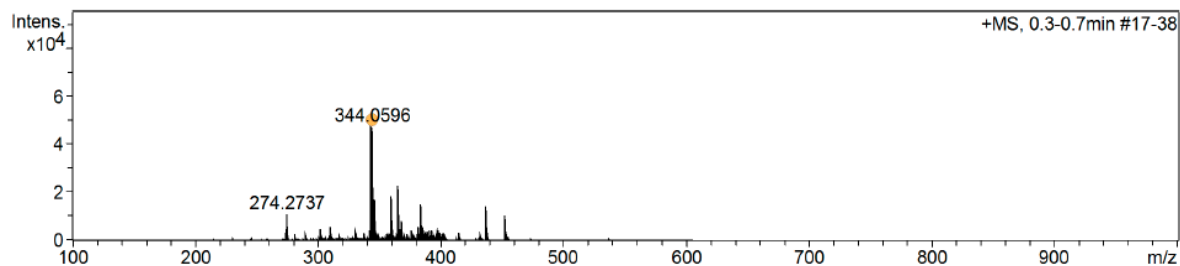

| Meas. m/z | # | Ion Formula     | m/z      | err [ppm] | mSigma | # Sigma | Score  | rdb  | e <sup>-</sup> Conf | N-Rule |
|-----------|---|-----------------|----------|-----------|--------|---------|--------|------|---------------------|--------|
| 344.0596  | 1 | C17H12ClFN3O2   | 344.0597 | 0.0       | 24.3   | 1       | 100.00 | 12.5 | even                | ok     |
|           | 2 | C15H11ClF4N3    | 344.0572 | 7.1       | 34.6   | 2       | 17.53  | 9.5  | even                | ok     |
|           | 3 | C16H17Cl2FNO2   | 344.0615 | 5.4       | 127.9  | 3       | 0.72   | 7.5  | even                | ok     |
|           | 1 | C20H13ClFNNa    | 344.0613 | -4.7      | 17.6   | 1       | 100.00 | 13.5 | even                | ok     |
|           | 2 | C17H14ClF2NNaO  | 344.0624 | 8.1       | 27.8   | 2       | 31.80  | 9.5  | even                | ok     |
|           | 3 | C15H13ClFN3NaO2 | 344.0573 | -7.0      | 33.2   | 3       | 38.93  | 9.5  | even                | ok     |

## HRMS chat of compound 4m

### Acquisition Parameter

|             |         |                      |          |                  |           |
|-------------|---------|----------------------|----------|------------------|-----------|
| Source Type | ESI     | Ion Polarity         | Positive | Set Nebulizer    | 0.3 Bar   |
| Focus       | Active  | Set Capillary        | 4500 V   | Set Dry Heater   | 200 °C    |
| Scan Begin  | 50 m/z  | Set End Plate Offset | -500 V   | Set Dry Gas      | 4.0 l/min |
| Scan End    | 600 m/z | Set Charging Voltage | 2000 V   | Set Divert Valve | Source    |
|             |         | Set Corona           | 0 nA     | Set APCI Heater  | 0 °C      |

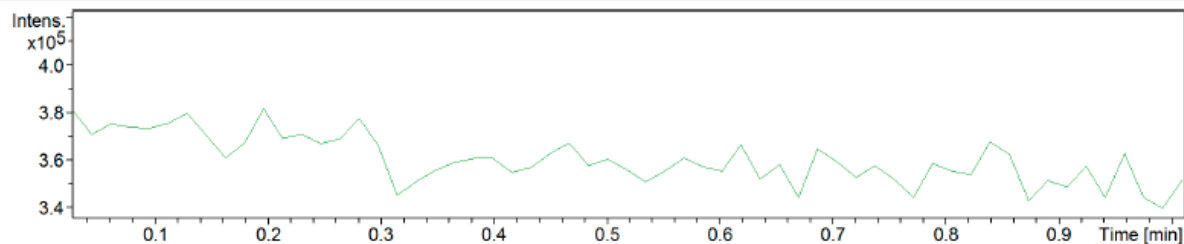

| #    | RT [min] | Area | Int. Type        | I    | S/N  | Chromatogram | Max. m/z | FWHM [min] |
|------|----------|------|------------------|------|------|--------------|----------|------------|
| n.a. | 0.4      | n.a. | Average spectrum | n.a. | n.a. | n.a.         | 359.0346 | n.a.       |

### +MS, 0.1-0.7min #3-39

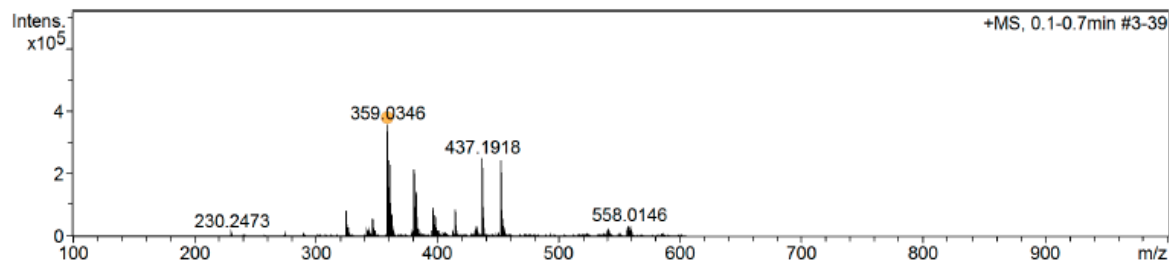

| Meas. m/z | # | Ion Formula     | m/z      | err [ppm] | mSigma | # Sigma | Score  | rdb  | e <sup>-</sup> Conf | N-Rule |
|-----------|---|-----------------|----------|-----------|--------|---------|--------|------|---------------------|--------|
| 359.0346  | 1 | C18H13Cl2N2O2   | 359.0349 | -0.6      | 36.1   | 1       | 100.00 | 12.5 | even                | ok     |
|           | 2 | C14H9Cl2N8      | 359.0322 | -6.9      | 42.1   | 2       | 20.19  | 13.5 | even                | ok     |
|           | 3 | C13H13Cl2N4O4   | 359.0308 | 10.6      | 46.4   | 3       | 4.69   | 8.5  | even                | ok     |
|           | 4 | C13H14Cl3N6     | 359.0340 | -1.8      | 113.2  | 4       | 5.49   | 8.5  | even                | ok     |
|           | 5 | C17H18Cl3O2     | 359.0367 | -5.7      | 116.6  | 5       | 1.88   | 7.5  | even                | ok     |
|           | 6 | C24H8ClN2       | 359.0371 | 6.7       | 172.1  | 6       | 0.03   | 21.5 | even                | ok     |
|           | 7 | C18H12ClO6      | 359.0317 | 8.2       | 173.5  | 7       | 0.01   | 12.5 | even                | ok     |
|           | 8 | C19H8ClN4O2     | 359.0330 | -4.5      | 174.5  | 8       | 0.04   | 17.5 | even                | ok     |
|           | 1 | C21H14Cl2Na     | 359.0365 | 5.1       | 36.0   | 1       | 100.00 | 13.5 | even                | ok     |
|           | 2 | C16H14Cl2N2NaO2 | 359.0325 | 6.1       | 40.4   | 2       | 67.62  | 9.5  | even                | ok     |
|           | 3 | C15H19Cl3NaO2   | 359.0343 | 1.0       | 115.0  | 3       | 14.43  | 4.5  | even                | ok     |
|           | 4 | C22H9ClN2Na     | 359.0346 | -0.0      | 173.9  | 4       | 0.25   | 18.5 | even                | ok     |

## HRMS chat of compound **4n**

### Acquisition Parameter

|             |         |                      |          |                  |           |
|-------------|---------|----------------------|----------|------------------|-----------|
| Source Type | ESI     | Ion Polarity         | Positive | Set Nebulizer    | 0.3 Bar   |
| Focus       | Active  | Set Capillary        | 4500 V   | Set Dry Heater   | 200 °C    |
| Scan Begin  | 50 m/z  | Set End Plate Offset | -500 V   | Set Dry Gas      | 4.0 l/min |
| Scan End    | 600 m/z | Set Charging Voltage | 2000 V   | Set Divert Valve | Source    |
|             |         | Set Corona           | 0 nA     | Set APCI Heater  | 0 °C      |

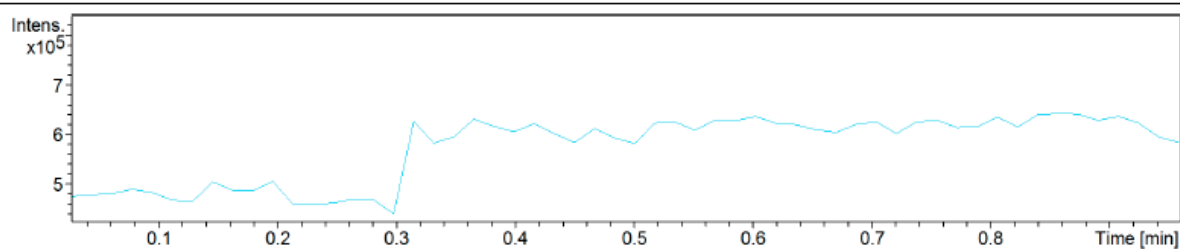

| #    | RT [min] | Area | Int. Type        | I    | S/N  | Chromatogram | Max. m/z | FWHM [min] |
|------|----------|------|------------------|------|------|--------------|----------|------------|
| n.a. | 0.3      | n.a. | Average spectrum | n.a. | n.a. | n.a.         | 382.0123 | n.a.       |

### +MS, 0.0-0.5min #2-31

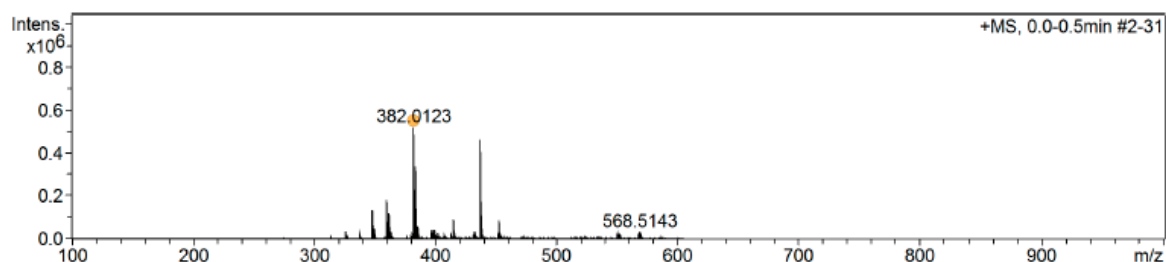

| Meas. m/z | #  | Ion Formula     | m/z      | err [ppm] | mSigma | # Sigma | Score  | rdB  | e <sup>-</sup> Conf | N-Rule |
|-----------|----|-----------------|----------|-----------|--------|---------|--------|------|---------------------|--------|
| 382.0123  | 1  | C15H6Cl2N9      | 382.0118 | 1.3       | 6.3    | 1       | 100.00 | 16.5 | even                | ok     |
|           | 2  | C19H10Cl2N3O2   | 382.0145 | 5.7       | 9.8    | 2       | 32.45  | 15.5 | even                | ok     |
|           | 3  | C14H10Cl2N5O4   | 382.0104 | -4.8      | 17.0   | 3       | 36.35  | 11.5 | even                | ok     |
|           | 4  | C13H14Cl2NO8    | 382.0091 | 8.3       | 28.3   | 4       | 8.86   | 6.5  | even                | ok     |
|           | 5  | C14H11Cl3N7     | 382.0136 | -3.5      | 138.2  | 5       | 0.54   | 11.5 | even                | ok     |
|           | 6  | C13H15Cl3N3O4   | 382.0123 | -0.0      | 140.4  | 6       | 0.92   | 6.5  | even                | ok     |
|           | 7  | C19H9ClNO6      | 382.0113 | 2.6       | 142.8  | 7       | 0.31   | 15.5 | even                | ok     |
|           | 8  | C20H5ClN5O2     | 382.0126 | -0.9      | 144.3  | 8       | 0.39   | 20.5 | even                | ok     |
|           | 9  | C15H5ClN7O4     | 382.0086 | -9.6      | 147.7  | 9       | 0.02   | 16.5 | even                | ok     |
|           | 10 | C16HCIN11       | 382.0099 | -6.1      | 148.6  | 10      | 0.08   | 21.5 | even                | ok     |
|           | 11 | C13H16Cl4N5     | 382.0154 | 8.3       | 192.4  | 11      | 0.00   | 6.5  | even                | ok     |
|           | 1  | C17H11Cl2N3NaO2 | 382.0121 | 0.6       | 7.0    | 1       | 100.00 | 12.5 | even                | ok     |
|           | 2  | C13H7Cl2N9Na    | 382.0094 | -7.6      | 15.8   | 2       | 13.51  | 13.5 | even                | ok     |
|           | 3  | C22H11Cl2NNa    | 382.0161 | 9.9       | 19.9   | 3       | 4.94   | 16.5 | even                | ok     |
|           | 4  | C16H16Cl3NNaO2  | 382.0139 | 4.2       | 140.3  | 4       | 0.35   | 7.5  | even                | ok     |
|           | 5  | C23H6ClN3Na     | 382.0142 | 5.1       | 144.3  | 5       | 0.13   | 21.5 | even                | ok     |
|           | 6  | C17H10ClNNaO6   | 382.0089 | 8.9       | 145.6  | 6       | 0.03   | 12.5 | even                | ok     |
|           | 7  | C18H6ClN5NaO2   | 382.0102 | 5.4       | 146.5  | 7       | 0.11   | 17.5 | even                | ok     |

## HRMS chat of compound **4o**

### Acquisition Parameter

|             |         |                      |          |                  |           |
|-------------|---------|----------------------|----------|------------------|-----------|
| Source Type | ESI     | Ion Polarity         | Positive | Set Nebulizer    | 0.3 Bar   |
| Focus       | Active  | Set Capillary        | 4500 V   | Set Dry Heater   | 200 °C    |
| Scan Begin  | 50 m/z  | Set End Plate Offset | -500 V   | Set Dry Gas      | 4.0 l/min |
| Scan End    | 600 m/z | Set Charging Voltage | 2000 V   | Set Divert Valve | Source    |
|             |         | Set Corona           | 0 nA     | Set APCI Heater  | 0 °C      |

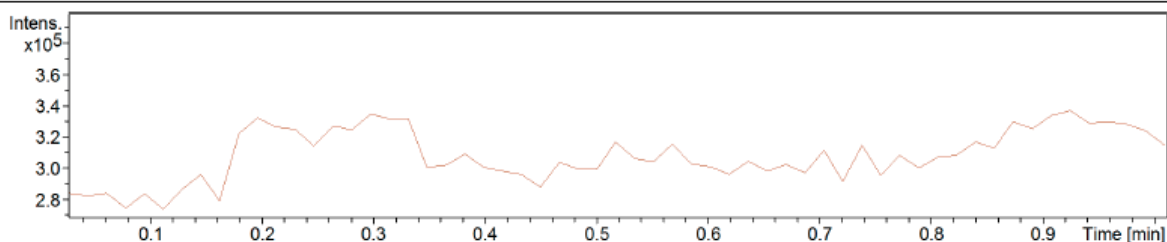

| #    | RT [min] | Area | Int. Type        | I    | S/N  | Chromatogram | Max. m/z | FWHM [min] |
|------|----------|------|------------------|------|------|--------------|----------|------------|
| n.a. | 0.2      | n.a. | Average spectrum | n.a. | n.a. | n.a.         | 360.0304 | n.a.       |

### +MS, 0.1-0.3min #3-19

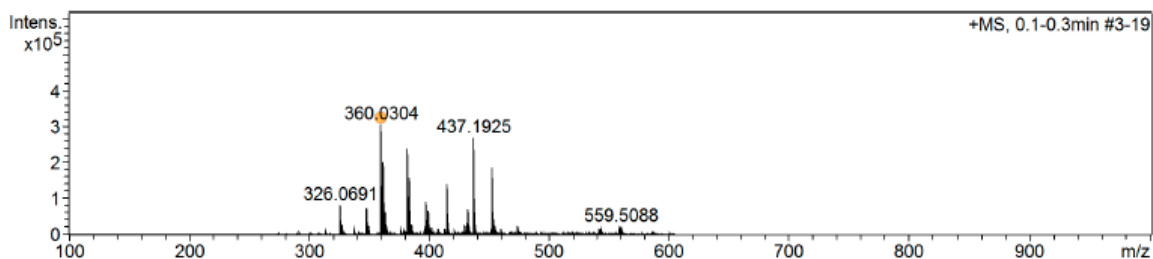

| Meas. m/z | # | Ion Formula     | m/z      | err [ppm] | mSigma | # Sigma | Score  | rdB  | e <sup>-</sup> Conf | N-Rule |
|-----------|---|-----------------|----------|-----------|--------|---------|--------|------|---------------------|--------|
| 360.0304  | 1 | C17H12Cl2N3O2   | 360.0301 | -0.8      | 40.1   | 1       | 100.00 | 12.5 | even                | ok     |
|           | 2 | C22H12Cl2N      | 360.0341 | -10.4     | 43.1   | 2       | 6.43   | 16.5 | even                | ok     |
|           | 3 | C13H8Cl2N9      | 360.0274 | 8.3       | 44.6   | 3       | 13.63  | 13.5 | even                | ok     |
|           | 4 | C12H13Cl3N7     | 360.0293 | -3.2      | 117.6  | 4       | 3.77   | 8.5  | even                | ok     |
|           | 5 | C16H17Cl3NO2    | 360.0319 | -4.3      | 121.0  | 5       | 2.44   | 7.5  | even                | ok     |
|           | 6 | C23H7ClN3       | 360.0323 | -5.3      | 168.0  | 6       | 0.06   | 21.5 | even                | ok     |
|           | 7 | C17H11ClNO6     | 360.0269 | -9.6      | 168.6  | 7       | 0.01   | 12.5 | even                | ok     |
|           | 8 | C18H7ClN5O2     | 360.0283 | -5.9      | 169.8  | 8       | 0.04   | 17.5 | even                | ok     |
|           | 1 | C20H13Cl2NNa    | 360.0317 | 3.7       | 40.7   | 1       | 100.00 | 13.5 | even                | ok     |
|           | 2 | C15H13Cl2N3NaO2 | 360.0277 | -7.5      | 43.2   | 2       | 32.70  | 9.5  | even                | ok     |
|           | 3 | C14H18Cl3NNaO2  | 360.0295 | 2.4       | 119.5  | 3       | 7.11   | 4.5  | even                | ok     |
|           | 4 | C21H8ClN3Na     | 360.0299 | 1.4       | 169.5  | 4       | 0.22   | 18.5 | even                | ok     |

## HRMS chat of compound **4p**

### Acquisition Parameter

|             |         |                      |          |                  |           |
|-------------|---------|----------------------|----------|------------------|-----------|
| Source Type | ESI     | Ion Polarity         | Positive | Set Nebulizer    | 0.3 Bar   |
| Focus       | Active  | Set Capillary        | 4500 V   | Set Dry Heater   | 200 °C    |
| Scan Begin  | 50 m/z  | Set End Plate Offset | -500 V   | Set Dry Gas      | 4.0 l/min |
| Scan End    | 600 m/z | Set Charging Voltage | 2000 V   | Set Divert Valve | Source    |
|             |         | Set Corona           | 0 nA     | Set APCI Heater  | 0 °C      |

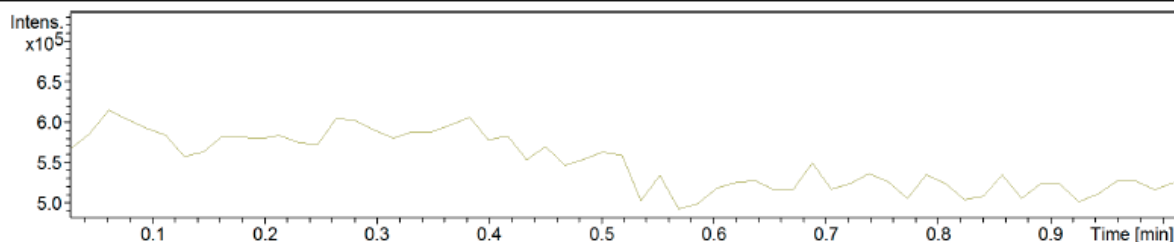

| #    | RT [min] | Area | Int. Type        | I    | S/N  | Chromatogram | Max. m/z | FWHM [min] |
|------|----------|------|------------------|------|------|--------------|----------|------------|
| n.a. | 0.8      | n.a. | Average spectrum | n.a. | n.a. | n.a.         | 359.0351 | n.a.       |

### +MS, 0.6-1.0min #36-57

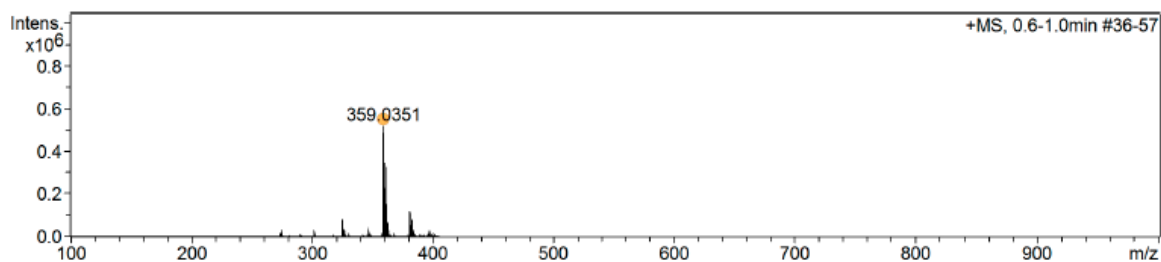

| Meas. m/z | # | Ion Formula     | m/z      | err [ppm] | mSigma | # Sigma | Score  | rdb  | e <sup>-</sup> Conf | N-Rule |
|-----------|---|-----------------|----------|-----------|--------|---------|--------|------|---------------------|--------|
| 359.0351  | 1 | C18H13Cl2N2O2   | 359.0349 | 0.7       | 7.3    | 1       | 100.00 | 12.5 | even                | ok     |
|           | 2 | C14H9Cl2N8      | 359.0322 | 8.1       | 18.1   | 2       | 12.90  | 13.5 | even                | ok     |
|           | 3 | C23H13Cl2       | 359.0389 | -10.5     | 18.7   | 3       | 5.16   | 16.5 | even                | ok     |
|           | 4 | C13H14Cl3N6     | 359.0340 | 3.0       | 128.8  | 4       | 0.97   | 8.5  | even                | ok     |
|           | 5 | C17H18Cl3O2     | 359.0367 | 4.4       | 132.7  | 5       | 0.56   | 7.5  | even                | ok     |
|           | 6 | C24H8ClN2       | 359.0371 | -5.4      | 154.1  | 6       | 0.07   | 21.5 | even                | ok     |
|           | 7 | C18H12ClO6      | 359.0317 | -9.5      | 155.4  | 7       | 0.02   | 12.5 | even                | ok     |
|           | 8 | C19H8ClN4O2     | 359.0330 | 5.8       | 156.4  | 8       | 0.06   | 17.5 | even                | ok     |
|           | 1 | C21H14Cl2Na     | 359.0365 | -3.8      | 9.4    | 1       | 100.00 | 13.5 | even                | ok     |
|           | 2 | C16H14Cl2N2NaO2 | 359.0325 | 7.4       | 16.6   | 2       | 33.08  | 9.5  | even                | ok     |
|           | 3 | C15H19Cl3NaO2   | 359.0343 | 2.3       | 130.9  | 3       | 1.94   | 4.5  | even                | ok     |
|           | 4 | C22H9ClN2Na     | 359.0346 | 1.3       | 155.8  | 4       | 0.30   | 18.5 | even                | ok     |

## HRMS chat of compound **4r**

### Acquisition Parameter

|             |         |                      |          |                  |           |
|-------------|---------|----------------------|----------|------------------|-----------|
| Source Type | ESI     | Ion Polarity         | Positive | Set Nebulizer    | 0.3 Bar   |
| Focus       | Active  | Set Capillary        | 4500 V   | Set Dry Heater   | 200 °C    |
| Scan Begin  | 50 m/z  | Set End Plate Offset | -500 V   | Set Dry Gas      | 4.0 l/min |
| Scan End    | 600 m/z | Set Charging Voltage | 2000 V   | Set Divert Valve | Source    |
|             |         | Set Corona           | 0 nA     | Set APCI Heater  | 0 °C      |

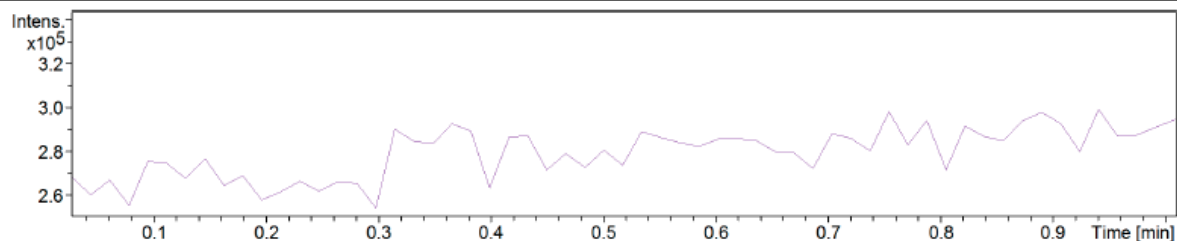

| #    | RT [min] | Area | Int. Type        | I    | S/N  | Chromatogram | Max. m/z | FWHM [min] |
|------|----------|------|------------------|------|------|--------------|----------|------------|
| n.a. | 0.5      | n.a. | Average spectrum | n.a. | n.a. | n.a.         | 360.0304 | n.a.       |

### +MS, 0.2-0.8min #10-49

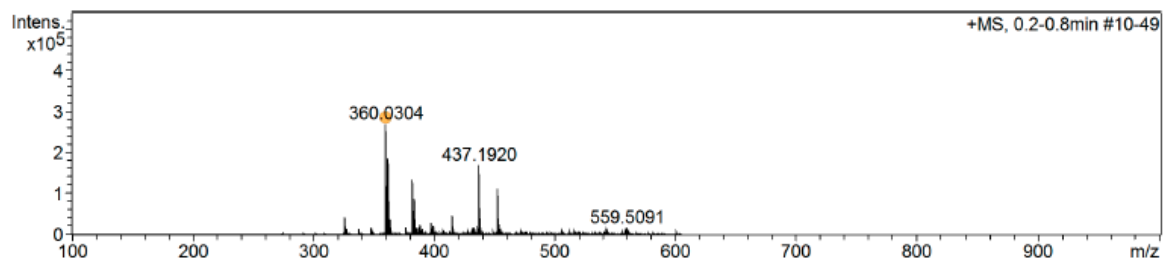

| Meas. m/z | # | Ion Formula     | m/z      | err [ppm] | mSigma | # Sigma | Score  | rdb  | e <sup>-</sup> Conf | N-Rule |
|-----------|---|-----------------|----------|-----------|--------|---------|--------|------|---------------------|--------|
| 360.0304  | 1 | C17H12Cl2N3O2   | 360.0301 | 0.9       | 16.9   | 1       | 100.00 | 12.5 | even                | ok     |
|           | 2 | C22H12Cl2N      | 360.0341 | 10.3      | 21.2   | 2       | 6.79   | 16.5 | even                | ok     |
|           | 3 | C13H8Cl2N9      | 360.0274 | -8.4      | 26.1   | 3       | 12.41  | 13.5 | even                | ok     |
|           | 4 | C12H13Cl3N7     | 360.0293 | 3.3       | 119.3  | 4       | 1.97   | 8.5  | even                | ok     |
|           | 5 | C16H17Cl3NO2    | 360.0319 | 4.2       | 122.9  | 5       | 1.32   | 7.5  | even                | ok     |
|           | 6 | C23H7ClN3       | 360.0323 | -5.2      | 165.5  | 6       | 0.04   | 21.5 | even                | ok     |
|           | 7 | C17H11ClNO6     | 360.0269 | 9.7       | 166.7  | 7       | 0.01   | 12.5 | even                | ok     |
|           | 8 | C18H7ClN5O2     | 360.0283 | -6.0      | 167.8  | 8       | 0.03   | 17.5 | even                | ok     |
|           | 1 | C20H13Cl2NNa    | 360.0317 | -3.6      | 16.7   | 1       | 100.00 | 13.5 | even                | ok     |
|           | 2 | C15H13Cl2N3NaO2 | 360.0277 | -7.6      | 24.2   | 2       | 28.14  | 9.5  | even                | ok     |
|           | 3 | C14H18Cl3NNaO2  | 360.0295 | 2.5       | 121.3  | 3       | 3.45   | 4.5  | even                | ok     |
|           | 4 | C21H8ClN3Na     | 360.0299 | 1.5       | 167.3  | 4       | 0.14   | 18.5 | even                | ok     |
